# Supplementary material
Source: PubMed Central journal article supplement (PMC7724568)
Supplement: jamapsychiatry-e203908-s001.pdf [file jamapsychiatry-e203908-s001.pdf]

## Supplementary Online Content

Oliver LD, Moxon-Emre I, Lai M-C, Grennan L, Voineskos AN, Ameis SH. Social cognitive performance in schizophrenia spectrum disorders compared with autism spectrum disorder: a systematic review, meta-analysis, and meta-regression. *JAMA Psychiatry*. Published online December 8, 2020. doi:10.1001/jamapsychiatry.2020.3908

**eMethods.** Supplemental Methods

**eTable 1.** Modified Newcastle-Ottawa Scale for Quality Assessment

**eResults. Supplemental Results**

**eTable 2.** Additional Information Provided by Contacted Authors

**eTable 3.** Emotion Processing Leave-One-Out Meta-analyses

**eTable 4.** Theory of Mind Leave-One-Out Meta-analyses

**eTable 5.** Reading the Mind in the Eyes Test Leave-One-Out Meta-analyses

**eFigure 1.** Forest Plots of Effect Sizes for Meta-analyses Prior to Outlier Removal

**eFigure 2.** Funnel Plots for Each Meta-analysis

**eFigure 3.** Theory of Mind Meta-Regression Scatterplot With Difference in Proportion of Participants on Antipsychotics as Moderator

**eReferences.**

This supplementary material has been provided by the authors to give readers additional information about their work.

## eMethods. Supplemental Methods

### *Search Strategy*

#### MEDLINE Search Terms

1. exp "schizophrenia spectrum and other psychotic disorders"/
2. schizo\*.mp.
3. exp Autism Spectrum Disorder/
4. autis\*.mp.
5. exp Social Perception/
6. exp Social Behavior/
7. social cognition.mp.
8. social behav\*.mp.
9. social perception.mp.
10. exp Facial Expression/
11. emotion\*.mp.
12. exp "Theory of Mind"/
13. theory of mind.mp.
14. mentali\*.mp.
15. perspective taking.mp.
16. exp Empathy/
17. empath\*.mp.
18. social knowledge.mp.
19. social cue.mp.
20. interpretation bias.mp.
21. attribution\* bias.mp.
22. attributional style.mp.
23. 1 or 2
24. 3 or 4
25. 5 or 6 or 7 or 8 or 9 or 10 or 11 or 12 or 13 or 14 or 15 or 16 or 17 or 18 or 19 or 20 or 21 or 22
26. 23 and 24 and 25
27. limit 26 to "review articles"
28. exp animals/ not humans.sh.
29. 27 or 28
30. 26 not 29

#### Embase Search Terms

1. exp schizophrenia/
2. schizo\*.mp.
3. exp autism/
4. autis\*.mp.
5. exp social cognition/
6. exp social behavior/
7. social cognition.mp.
8. social behav\*.mp.

9. social perception.mp.
10. exp facial expression/
11. emotion\*.mp.
12. exp "theory of mind"/
13. theory of mind.mp.
14. mentali\*.mp.
15. perspective taking.mp.
16. exp empathy/
17. empath\*.mp.
18. social knowledge.mp.
19. social cue.mp.
20. exp interpretation bias/
21. exp attributional bias/
22. interpretation bias.mp.
23. attribution\* bias.mp.
24. attributional style.mp.
25. 1 or 2
26. 3 or 4
27. 5 or 6 or 7 or 8 or 9 or 10 or 11 or 12 or 13 or 14 or 15 or 16 or 17 or 18 or 19 or 20 or 21 or 22 or 23 or 24
28. 25 and 26 and 27
29. limit 28 to review
30. (exp animal/ or nonhuman/) not exp human/
31. 29 or 30
32. 28 not 31

#### PsycINFO Search Terms

1. exp schizophrenia/
2. schizo\*.mp.
3. exp autism spectrum disorders/
4. autis\*.mp.
5. exp social cognition/
6. exp social behavior/
7. exp social perception/
8. social cognition.mp.
9. social behav\*.mp.
10. social perception.mp.
11. exp emotion recognition/
12. exp facial expressions/
13. exp emotional responses/
14. emotion\*.mp.
15. exp "theory of mind"/
16. exp mentalization/
17. theory of mind.mp.
18. mentali\*.mp.
19. perspective taking.mp.

20. exp empathy/
21. empath\*.mp.
22. social knowledge.mp.
23. social cue.mp.
24. exp interpretive bias/
25. exp attribution/
26. interpretation bias.mp.
27. attribution\* bias.mp.
28. attributional style.mp.
29. 1 or 2
30. 3 or 4
31. 5 or 6 or 7 or 8 or 9 or 10 or 11 or 12 or 13 or 14 or 15 or 16 or 17 or 18 or 19 or 20 or 21 or 22 or 23 or 24 or 25 or 26 or 27 or 28
32. 29 and 30 and 31
33. limit 32 to reviews
34. exp animals/ not humans.sh.
35. 33 or 34
36. 32 not 35

mp = title, abstract, original title, name of substance word, subject heading word, floating sub-heading word, keyword heading word, protocol supplementary concept word, rare disease supplementary concept word, unique identifier, synonyms

#### Web of Science Search Terms

(autism OR autis\*) AND (schizophrenia OR schizo\*) AND (“social cognition” OR social behav\* OR “social perception” OR facial expression OR emotion\* OR “theory of mind” OR mentali\* OR “perspective taking” OR empath\* OR “social knowledge” OR social cue OR interpret\* bias OR attribution\* bias OR attributional style) NOT animal

EXCLUDE - Review and Book Chapter

#### *Eligibility Criteria*

SSDs groups could include people with schizophrenia spectrum disorders (schizophrenia, schizoaffective disorder, schizophreniform disorder, delusional disorder, brief psychotic disorder, schizotypal or schizoid personality disorder, or psychosis not otherwise specified) or first episode psychosis (which can be associated with SSDs, bipolar disorder, depression with psychotic features, substance-induced psychosis, or organic psychosis), according to ICD-10,<sup>1</sup> DSM-IV,<sup>2</sup> or DSM-5<sup>3</sup> definitions. ASD groups included people with autism spectrum disorder (autistic disorder/childhood autism, Asperger’s disorder/syndrome, pervasive developmental disorder not otherwise specified, or atypical autism) according to ICD-10,<sup>1</sup> DSM-IV,<sup>2</sup> or DSM-5<sup>3</sup> definitions. No age restrictions were imposed.

Disagreements (N=81) occurred at the title and abstract screening stage due to differences in the amount of information required to categorize an article as ‘uncertain’ versus ‘exclude’ or ‘include’, and were resolved at the full-text assessment stage with additional information.

Uncertainties amongst reviewers regarding study eligibility (N=135) were most often due to ambiguity regarding inclusion of a performance-based social cognitive task or inclusion of both SSDs and ASD groups. Eligibility uncertainties were reconciled among the reviewers (LO, IM, AV, SA) through further discussion and clarification of the eligibility criteria.

### *Data Extraction*

The following variables were extracted from each article, where possible:

- Article Details: Author, Year, Title, Journal
- Participant Group Details: Ns, Diagnostic Tool, Medication Status, Mean Chlorpromazine Equivalents, Illness Duration, Inclusion Criteria, Exclusion Criteria
- Demographics: Sex, Age, IQ, Education
- Outcomes: Social Cognitive Measures
- Clinical Symptoms: Positive and Negative Syndrome Scale (PANSS), Autism Diagnostic Observation Schedule (ADOS), Autism Diagnostic Interview-Revised (ADI-R), Social Responsiveness Scale, Autism Spectrum Quotient, Brief Psychiatric Rating Scale (BPRS), Scale for the Assessment of Negative Symptoms (SANS)
- Neurocognition: MATRICS Consensus Cognitive Battery, Verbal Fluency, Working Memory, Processing Speed Indices
- Everyday Functioning: Birchwood Social Functioning Scale, Personal and Social Performance Scale

When SSDs and ASD group means and standard deviations (SDs) were not provided, they were calculated from other values reported in the study, where possible. Specifically, mean and SD values were calculated from median, max, and min values with a widely used formula<sup>4</sup> for two studies,<sup>5,6</sup> and from median, Q1, and Q3 values using the *estmeansd* package<sup>7</sup> in R for another.<sup>8</sup> Formulas from the Cochrane Handbook<sup>9</sup> were used to calculate combined means and SDs for papers where subgroup values were reported but not overall means,<sup>10,11</sup> and SDs for two papers that reported mean and 95% confidence intervals.<sup>6,12</sup> For articles that only reported these values in plots,<sup>13-15</sup> they were extracted using WebPlotDigitizer.<sup>16</sup> Calculations and plot extractions were performed twice, by independent reviewers (LO, IM).

### *Quality Assessment*

A modified version of the Newcastle-Ottawa Scale (NOS)<sup>17</sup> for case-control studies was used to assess the quality and risk of bias of included articles. Included articles were divided and assessed by either LO or IM. Questions were modified to focus on the SSDs and ASD groups rather than cases and controls (eTable 1). The scale was also adapted to check for deliberate comparability of age and sex between SSDs and ASD groups, as well as any other factor (e.g., IQ). Representativeness questions were replaced by depth of sample characterization questions as all cases were consecutive. Questions were also added to address medication status, correction for multiple comparisons, and numerical data availability.

**eTable 1. Modified Newcastle-Ottawa Scale for Quality Assessment**

| Points | Description                                                                                                     |
|--------|-----------------------------------------------------------------------------------------------------------------|
|        | <i>Adequacy of the case definition (SSDs)</i>                                                                   |
| 1      | Independent validation (1+ person or process) to ensure diagnostic accuracy                                     |
| 0      | No description of independent validation process                                                                |
|        | <i>Adequacy of the case definition (ASD)</i>                                                                    |
| 1      | Independent validation (1+ person or process) to ensure diagnostic accuracy                                     |
| 0      | No description of independent validation process                                                                |
|        | <i>Depth of Sample Characterization</i>                                                                         |
| 1      | Includes information such as neurological status, substance abuse, family history, comorbidities for SSDs group |
| 1      | Includes information such as neurological status, substance abuse, family history, comorbidities for ASD group  |
| 0      | No additional sample information provided                                                                       |
|        | <i>Comparability of groups on the basis of the design or analysis (SSDs, ASD)</i>                               |
| 1      | Groups are matched for age or gender and/or analyses are adjusted for age or gender                             |
| 1      | Group are matched for another factor and/or analyses are adjusted for another factor (additional point)         |
| 0      | No description of comparability based on factors of interest                                                    |
|        | <i>Medication summary</i>                                                                                       |
| 1      | Clear description of medication status for SSDs group                                                           |
| 1      | Clear description of medication status for ASD group                                                            |
| 0      | No description of medication status for case groups                                                             |
|        | <i>Correction for multiple comparisons</i>                                                                      |
| 1      | Clear description of process to correct for multiple comparisons in analyses                                    |
| 0      | No description of process to correct for multiple comparisons in analyses                                       |
|        | <i>Numerical Data Availability</i>                                                                              |
| 1      | Means and standard deviations provided                                                                          |
| 0      | Values required conversion for analyses (e.g. medians, ranges)                                                  |
|        | The maximum score for each study was 10 points, with lower scores reflecting greater risk of bias.              |

### *Meta-Analyses*

Social cognitive outcomes were categorized by the first author (LO) based on task descriptions and/or task development literature, and verified by co-authors. Studies could contribute a maximum of one measure to each meta-analysis; if there were multiple options from a given category, the most canonical or frequently used metric in our analysis was selected (Table 1).

Outliers and influential studies were detected using studentized residuals ( $>|3|$ ), and leave-one-out and combinatorial meta-analyses.<sup>18,19</sup> Leave-one-out meta-analyses involve running a series of meta-analyses, leaving out one study each time. Combinatorial meta-analyses involve calculating all possible meta-analysis study combinations, or fitting the meta-analytic model to all possible subsets of the studies included.<sup>18,19</sup> These methods allow for the exploration of effect sizes and heterogeneity patterns across included studies, the detection of influential studies or subgroups of influential studies, and test the robustness of effects.

#### *Moderator Analyses*

Primary moderator analyses were limited to examining the effects of publication year and age difference due to the relatively small number of studies included in the meta-analyses, our interest in the effects of evolving diagnostic criteria and research practices over time and different developmental trajectories between disorders, and the inconsistency and/or lack of reporting of other potential moderators of interest.

### **eResults. Supplemental Results**

#### *Study Selection and Characteristics*

Authors were contacted when data from a performance-based social cognitive task were collected but not reported by group, when clarification was needed in order to use reported data, or when it was suspected that a sample might overlap with another included paper (see eTable 2). One study was excluded as it collected an assessment of theory of mind (ToM), but no social cognitive data were reported or provided.<sup>20</sup> Another paper<sup>21</sup> was excluded as it used an overlapping sample and the same social cognitive tasks as another included paper that reports additional pertinent information for our analyses (IQ, medication information).<sup>22</sup> A subsample of overlapping participants was also identified between two studies,<sup>23,24</sup> but they were not included in the same meta-analyses, negating the risk of data non-independence. All included studies used observational, cross-sectional designs.

**eTable 2. Additional information provided by contacted authors**

| Author                                                                                                                                      | Year | Information Provided                                              |
|---------------------------------------------------------------------------------------------------------------------------------------------|------|-------------------------------------------------------------------|
| Couture <sup>25</sup>                                                                                                                       | 2006 | Social cognitive data from thesis is presented in 2010 paper      |
| Demetriou et al. <sup>26</sup>                                                                                                              | 2020 | Confirmed sample overlaps with that from Pepper et al., 2018      |
| Dubreucq et al. <sup>20</sup>                                                                                                               | 2020 | No social cognitive data provided (none reported in paper)        |
| Graux et al. <sup>27</sup>                                                                                                                  | 2019 | Corrected gender information by diagnostic group                  |
| Lugnegård et al. <sup>28</sup>                                                                                                              | 2013 | Clarified ASD diagnoses were based on DSM-IV criteria             |
| Murphy <sup>13</sup>                                                                                                                        | 2006 | Access to mean and standard deviation data no longer available    |
| Ozguven et al. <sup>5</sup>                                                                                                                 | 2010 | Clarified 'ss' values reported in Table 1 are standard deviations |
| Schwarz et al. <sup>29</sup>                                                                                                                | 2019 | RMET means and standard deviations by diagnostic group            |
| Stanfield et al. <sup>30</sup>                                                                                                              | 2017 | No additional data provided                                       |
| Stefanik et al. <sup>31</sup>                                                                                                               | 2018 | Means and standard deviations by diagnostic group                 |
| Veddum et al. <sup>12</sup>                                                                                                                 | 2019 | Corrected mean age and CI for SSDs group                          |
| ASD = autism spectrum disorder, SSDs = schizophrenia spectrum disorders, RMET = Reading the Mind in the Eyes task, CI = confidence interval |      |                                                                   |

### *Social Cognitive Measures*

Included emotion processing measures evaluated emotion recognition via labeling or matching, either from isolated faces, context-embedded faces, or short videos of people. Included ToM or mentalizing measures assessed intention understanding, belief inference, and/or perspective taking from stories, animations, pictorial descriptions, puppets interacting, or videos of people interacting.

Three articles were excluded from the quantitative analyses. One study did not provide adequate data for use in the meta-analyses, but found no significant difference in emotion recognition performance between participants with schizotypal personality disorder and ASD.<sup>30</sup> The other two studies utilized behavioral social cognitive measures (the Trustworthiness Task<sup>11</sup> and a social skills paradigm<sup>32</sup>) that did not align with our emotion processing and ToM domains.

### *Additional Measures*

Nine studies included a measure of non-social cognition,<sup>5,8,12,15,29,31,33-35</sup> but these varied widely, with working memory and processing speed indices being the most common. The Positive and Negative Syndrome Scale (PANSS;  $k=19$ ) and the Autism Diagnostic Observation Schedule (ADOS;  $k=9$ ) were the most commonly reported measures capturing clinical symptoms for SSDs and ASD groups, respectively. However, the scores/subscores provided from each study varied. Only five studies reported PANSS scores in both groups<sup>6,32,36-38</sup> and one reported ADOS scores in both.<sup>38</sup> Twelve studies reported a measure of autistic symptoms,<sup>8,27,29,31,38-45</sup> and only two reported a measure of autistic symptoms across groups, or measures of schizophrenia and autistic symptoms in both groups.<sup>38,42</sup> Measures of everyday functioning were also rare, with only five studies providing such data.<sup>6,12,31,38,46</sup>



Ten articles reported neuroimaging data in conjunction with performance-based social cognition in both individuals with SSDs and ASD (six fMRI,<sup>11,29,30,38-40</sup> one functional near-infrared spectroscopy,<sup>8</sup> one fMRI and electroencephalography,<sup>45</sup> one diffusion tensor imaging and cortical thickness,<sup>31</sup> and one voxel-based morphometry<sup>43</sup>). Sample sizes of the SSDs and ASD groups were less than 25 in at least one group in seven of these studies. Findings from these investigations were mixed, with five functional studies (three fMRI,<sup>30,38,39</sup> one fMRI and electroencephalography,<sup>45</sup> one functional near-infrared spectroscopy<sup>8</sup>) providing evidence in support of neural abnormalities associated with social cognition being disorder-specific, four studies (three fMRI,<sup>11,29,40</sup> one diffusion tensor imaging and cortical thickness<sup>31</sup>) suggesting neural abnormalities may be related to social cognitive deficits across disorders, and another including voxel-based morphometry with results that largely did not survive correction for multiple comparisons.<sup>43</sup>

### Quantitative Results

**eFigure 1.** Forest plots of effect sizes for meta-analyses prior to outlier removal

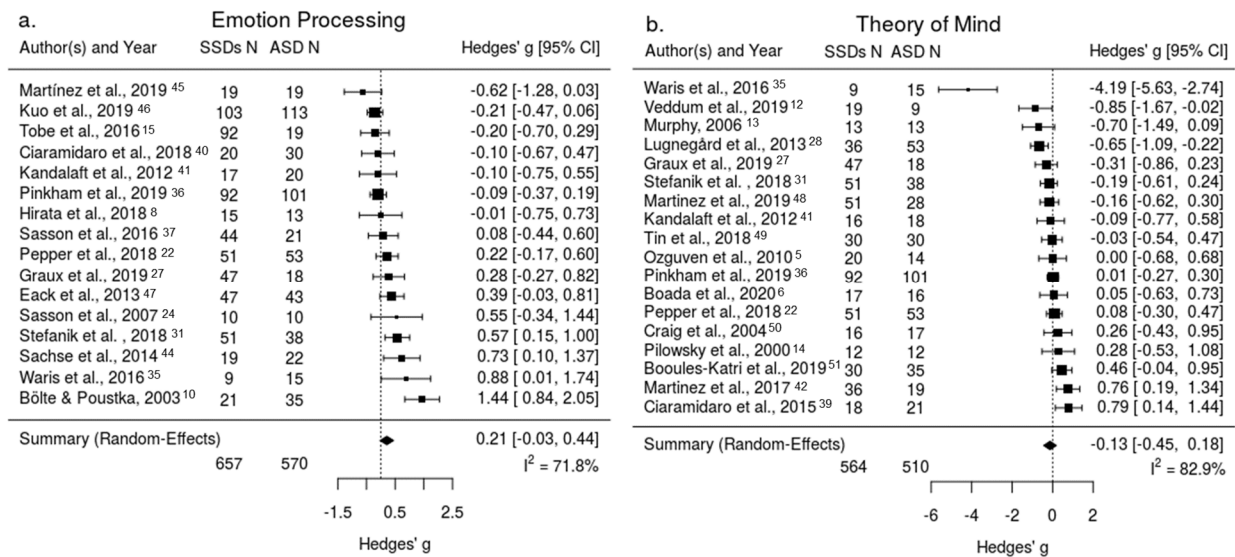

**eFigure 1.** Forest plots displaying standardized mean differences (Hedges' g) and 95% confidence intervals (CI) for **a)** emotion processing and **b)** theory of mind meta-analyses prior to outlier removal. Hedges' g > 0 indicates that the SSDs group outperforms the ASD group. Square size is proportional to study weight in the model.

**eFigure 2.** Funnel plots for each meta-analysis

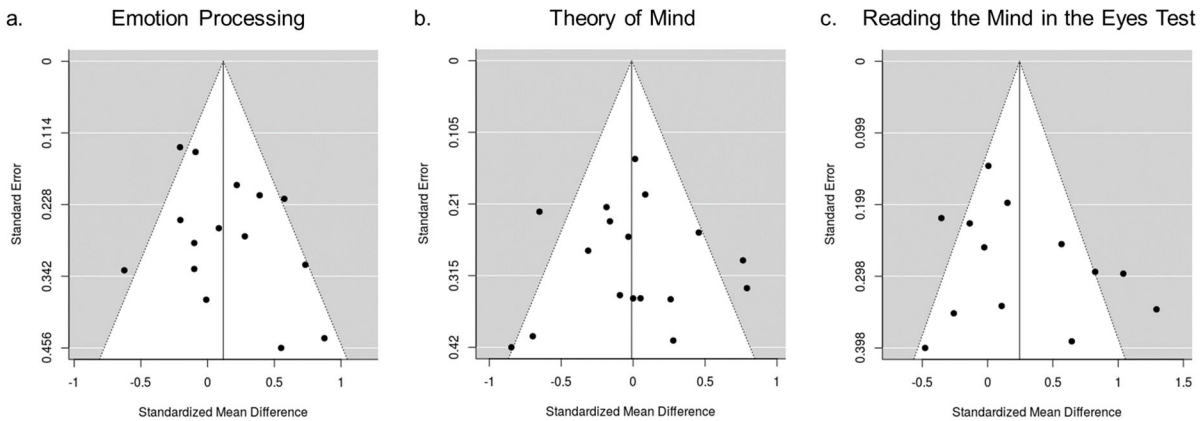

**eFigure 2.** Funnel plots for detecting publication bias in **a)** emotion processing, **b)** theory of mind, and **c)** the Reading the Mind in the Eyes test meta-analyses after outlier removal (where detected).

*Emotion Processing*

**eTable 3.** Emotion processing leave-one-out meta-analyses

| Excluded Study                         | Hedges' g | 95% CI      | <i>p</i> | Q    | <i>p</i> <sub>Q</sub> | $\tau^2$ | I <sup>2</sup> |
|----------------------------------------|-----------|-------------|----------|------|-----------------------|----------|----------------|
| Bölte & Poustka, 2003 <sup>10</sup>    | 0.12      | -0.07, 0.30 | .208     | 28.9 | .011                  | 0.061    | 51.0%          |
| Eack et al., 2013 <sup>47</sup>        | 0.20      | -0.06, 0.45 | .128     | 46.3 | <.0001                | 0.168    | 73.3%          |
| Hirata et al., 2018 <sup>8</sup>       | 0.22      | -0.03, 0.47 | .080     | 48.0 | <.0001                | 0.164    | 74.2%          |
| Sachse et al., 2014 <sup>44</sup>      | 0.18      | -0.06, 0.42 | .148     | 44.4 | <.0001                | 0.148    | 71.8%          |
| Sasson et al., 2007 <sup>24</sup>      | 0.19      | -0.05, 0.44 | .117     | 47.2 | <.0001                | 0.159    | 73.7%          |
| Sasson et al., 2016 <sup>37</sup>      | 0.22      | -0.03, 0.47 | .089     | 48.1 | <.0001                | 0.169    | 74.2%          |
| Stefanik et al., 2018 <sup>31</sup>    | 0.18      | -0.07, 0.43 | .151     | 43.4 | <.0001                | 0.155    | 71.9%          |
| Tobe et al., 2016 <sup>15</sup>        | 0.24      | -0.01, 0.48 | .057     | 46.3 | <.0001                | 0.157    | 72.5%          |
| Ciaramidaro et al., 2018 <sup>40</sup> | 0.23      | -0.02, 0.48 | .070     | 47.5 | <.0001                | 0.163    | 73.6%          |
| Waris et al., 2016 <sup>35</sup>       | 0.18      | -0.06, 0.42 | .139     | 45.1 | <.0001                | 0.146    | 72.0%          |
| Kandalaf et al., 2012 <sup>41</sup>    | 0.23      | -0.02, 0.48 | .072     | 47.6 | <.0001                | 0.163    | 73.8%          |
| Pepper et al., 2018 <sup>22</sup>      | 0.21      | -0.05, 0.47 | .108     | 47.8 | <.0001                | 0.173    | 73.6%          |
| Pinkham et al., 2019 <sup>36</sup>     | 0.24      | -0.02, 0.49 | .066     | 45.5 | <.0001                | 0.163    | 70.8%          |
| Kuo et al., 2019 <sup>46</sup>         | 0.25      | 0.00, 0.49  | .049     | 41.0 | .0002                 | 0.151    | 68.7%          |
| Martínez et al., 2019 <sup>45</sup>    | 0.25      | 0.02, 0.48  | .031     | 42.9 | <.0001                | 0.129    | 69.1%          |
| Graux et al., 2019 <sup>27</sup>       | 0.21      | -0.05, 0.46 | .110     | 47.7 | <.0001                | 0.169    | 74.2%          |

Sensitivity analyses (Table 2) revealed that the overall effect size remained non-significant for emotion processing after excluding two studies that required calculations or plot extraction<sup>8,15</sup>

( $k=13, g=0.15, p=.14$ ), one study that included only first episode psychosis as their SSDs group<sup>22</sup> ( $k=14, g=0.11, p=.28$ ), and one study that included youth participants only (ages 13-18) across ASD and SSDs groups<sup>35</sup> ( $k=14, g=0.09, p=.33$ ).

*Theory of Mind (ToM)*

**eTable 4. Theory of mind leave-one-out meta-analyses**

| Excluded Study                           | Hedges' g | 95% CI      | p    | Q    | p <sub>Q</sub> | τ <sup>2</sup> | I <sup>2</sup> |
|------------------------------------------|-----------|-------------|------|------|----------------|----------------|----------------|
| Ciaramidaro et al., 2015 <sup>39</sup>   | -0.18     | -0.48, 0.13 | .259 | 60.3 | <.0001         | 0.315          | 81.2%          |
| Craig et al., 2004 <sup>50</sup>         | -0.16     | -0.50, 0.18 | .358 | 66.1 | <.0001         | 0.412          | 85.1%          |
| Lugnegård et al., 2013 <sup>28</sup>     | -0.10     | -0.43, 0.23 | .561 | 58.8 | <.0001         | 0.372          | 82.9%          |
| Martinez et al., 2017 <sup>42</sup>      | -0.18     | -0.48, 0.13 | .254 | 58.9 | <.0001         | 0.309          | 80.8%          |
| Murphy, 2006 <sup>13</sup>               | -0.10     | -0.43, 0.22 | .536 | 64.3 | <.0001         | 0.373          | 83.9%          |
| Ozguven et al., 2010 <sup>5</sup>        | -0.15     | -0.49, 0.20 | .405 | 66.9 | <.0001         | 0.427          | 85.5%          |
| Pilowsky et al., 2000 <sup>14</sup>      | -0.16     | -0.50, 0.18 | .359 | 66.3 | <.0001         | 0.408          | 85.1%          |
| Stefanik et al., 2018 <sup>31</sup>      | -0.14     | -0.49, 0.21 | .443 | 66.5 | <.0001         | 0.437          | 85.0%          |
| Tin et al., 2018 <sup>49</sup>           | -0.15     | -0.50, 0.20 | .410 | 66.9 | <.0001         | 0.435          | 85.3%          |
| Waris et al., 2016 <sup>35</sup>         | -0.01     | -0.21, 0.19 | .917 | 35.1 | .004           | 0.091          | 56.5%          |
| Booules-Katri et al., 2019 <sup>51</sup> | -0.17     | -0.50, 0.16 | .311 | 62.6 | <.0001         | 0.384          | 83.7%          |
| Kandalaft et al., 2012 <sup>41</sup>     | -0.14     | -0.49, 0.20 | .422 | 66.9 | <.0001         | 0.428          | 85.5%          |
| Pepper et al., 2018 <sup>22</sup>        | -0.16     | -0.51, 0.20 | .385 | 66.4 | <.0001         | 0.434          | 84.7%          |
| Veddum et al., 2019 <sup>12</sup>        | -0.09     | -0.41, 0.22 | .566 | 63.2 | <.0001         | 0.348          | 82.9%          |
| Martinez et al., 2019 <sup>48</sup>      | -0.14     | -0.49, 0.21 | .437 | 66.7 | <.0001         | 0.436          | 85.2%          |
| Pinkham et al., 2019 <sup>36</sup>       | -0.15     | -0.50, 0.20 | .400 | 66.7 | <.0001         | 0.441          | 83.8%          |
| Graux et al., 2019 <sup>27</sup>         | -0.13     | -0.47, 0.22 | .468 | 66.0 | <.0001         | 0.425          | 85.2%          |
| Boada et al., 2020 <sup>6</sup>          | -0.15     | -0.50, 0.20 | .395 | 66.8 | <.0001         | 0.426          | 85.5%          |

**eFigure 3.** Theory of mind meta-regression scatterplot including difference in proportion of participants on antipsychotics as moderator

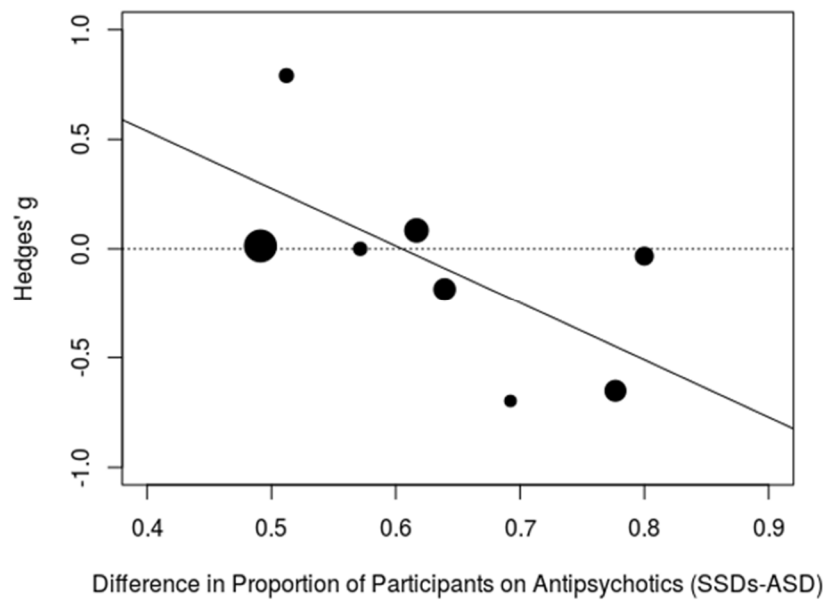

**eFigure 3.** Scatterplot displaying theory of mind performance effect sizes of the individual studies (Hedges'  $g$ ; SSDs-ASD) plotted against difference in proportion of participants on antipsychotics (SSDs-ASD). Hedges'  $g > 0$  indicates that the SSDs group outperforms the ASD group. Point radius is proportional to study weight in the model (larger points signify larger/more precise studies).

The overall effect size for theory of mind remained non-significant after excluding the five studies that required calculations or plot extraction<sup>5,6,12-14</sup> ( $k=12$ ,  $g=0.05$ ,  $p=.68$ ), and those including only schizotypal or schizoid personality disorder<sup>51</sup> or only first episode psychosis<sup>22</sup> in their SSDs group ( $k=15$ ,  $g=-0.06$ ,  $p=.62$ ). One study that included only youth participants<sup>35</sup> was the detected outlier. Overall effects were still non-significant after excluding remaining studies that included only youth participants<sup>14,49</sup> ( $k=15$ ,  $g=-0.02$ ,  $p=.85$ ; Table 2).

Reading the Mind in the Eyes Test (RMET)

**eTable 5. Reading the Mind in the Eyes test leave-one-out meta-analyses**

| Excluded Study                           | Hedges' g | 95% CI      | p    | Q    | p <sub>α</sub> | τ <sup>2</sup> | I <sup>2</sup> |
|------------------------------------------|-----------|-------------|------|------|----------------|----------------|----------------|
| Couture et al., 2010 <sup>23</sup>       | 0.28      | -0.03, 0.59 | .073 | 39.9 | <.0001         | 0.212          | 75.9%          |
| Craig et al., 2004 <sup>50</sup>         | 0.28      | -0.02, 0.58 | .067 | 40.4 | <.0001         | 0.206          | 76.5%          |
| Lugnegård et al., 2013 <sup>28</sup>     | 0.30      | 0.01, 0.59  | .043 | 35.5 | <.0001         | 0.182          | 72.8%          |
| Murphy, 2006 <sup>13</sup>               | 0.29      | -0.00, 0.58 | .051 | 39.3 | <.0001         | 0.191          | 75.4%          |
| Sachse et al., 2014 <sup>44</sup>        | 0.17      | -0.09, 0.42 | .210 | 30.9 | .001           | 0.133          | 67.8%          |
| Krawczyk et al., 2014 <sup>34</sup>      | 0.22      | -0.08, 0.52 | .156 | 40.5 | <.0001         | 0.210          | 77.1%          |
| Radeloff et al., 2014 <sup>43</sup>      | 0.18      | -0.10, 0.45 | .207 | 32.8 | .001           | 0.157          | 71.0%          |
| Booules-Katri et al., 2019 <sup>51</sup> | 0.22      | -0.09, 0.53 | .167 | 39.4 | <.0001         | 0.216          | 76.6%          |
| Kandalaf et al., 2012 <sup>41</sup>      | 0.26      | -0.05, 0.57 | .106 | 42.0 | <.0001         | 0.224          | 77.9%          |
| Pepper et al., 2018 <sup>22</sup>        | 0.26      | -0.06, 0.57 | .115 | 42.0 | <.0001         | 0.231          | 76.8%          |
| Pinkham et al., 2019 <sup>36</sup>       | 0.27      | -0.04, 0.59 | .092 | 40.3 | <.0001         | 0.225          | 74.5%          |
| Schwarz et al., 2019 <sup>29</sup>       | 0.20      | -0.10, 0.49 | .189 | 36.7 | <.0001         | 0.190          | 74.6%          |
| Hyatt et al., 2020 <sup>38</sup>         | 0.27      | -0.04, 0.58 | .089 | 41.3 | <.0001         | 0.221          | 77.1%          |

The overall effect size for the RMET remained non-significant after excluding one study that required plot extraction<sup>13</sup> ( $k=12$ ,  $g=0.29$ ,  $p=.052$ ), and studies with only schizotypal or schizoid personality disorder<sup>51</sup> or only first episode psychosis<sup>22</sup> in their SSDs group ( $k=11$ ,  $g=0.23$ ,  $p=.20$ ; Table 2). No RMET studies included only youth participants.

## eReferences

1. WHO. *ICD-10: International statistical classification of diseases and related health problems (10th revision)*. Geneva: World Health Organization; 2004.
2. APA. *Diagnostic and Statistical Manual of Mental Disorders (4th ed.)*. 1994.
3. APA. *Diagnostic and Statistical Manual of Mental Disorders (5th ed.)*. 2013.
4. Hozo SP, Djulbegovic B, Hozo I. Estimating the mean and variance from the median, range, and the size of a sample. *BMC Med Res Methodol*. 2005;5:13.
5. Ozguven HD, Oner O, Baskak B, Oktem F, Olmez S, Munir K. Theory of Mind in Schizophrenia and Asperger's Syndrome: Relationship with Negative Symptoms. *Klinik Psikofarmakol Bulteni*. 2010;20(1):5-13.
6. Boada L, Lahera G, Pina-Camacho L, et al. Social cognition in autism and schizophrenia spectrum disorders: The same but different? *Journal of autism and developmental disorders*. 2020;50(8):3046-3059.
7. McGrath S, Zhao X, Steele R, Thombs BD, Benedetti A, Collaboration DESD. Estimating the sample mean and standard deviation from commonly reported quantiles in meta-analysis. *Stat Methods Med Res*. 2020:962280219889080.
8. Hirata K, Egashira K, Harada K, et al. Differences in frontotemporal dysfunction during social and non-social cognition tasks between patients with autism spectrum disorder and schizophrenia. *Sci Rep*. 2018;8(1):3014.
9. Higgins JPT, Green S, Collaboration C. *Cochrane handbook for systematic reviews of interventions*. Chichester, England; Hoboken, NJ: Wiley-Blackwell; 2008.
10. Bölte S, Poustka F. The recognition of facial affect in autistic and schizophrenic subjects and their first-degree relatives. *Psychological medicine*. 2003;33(5):907-915.
11. Pinkham AE, Hopfinger JB, Pelphrey KA, Piven J, Penn DL. Neural bases for impaired social cognition in schizophrenia and autism spectrum disorders. *Schizophrenia Research*. 2008;99(1-3):164-175.
12. Veddum L, Pedersen HL, Landert AL, Bliksted V. Do patients with high-functioning autism have similar social cognitive deficits as patients with a chronic cause of schizophrenia? *Nordic Journal of Psychiatry*. 2019;73(1):44-50.
13. Murphy D. Theory of mind in Asperger's syndrome, schizophrenia and personality disordered forensic patients. *Cognitive Neuropsychiatry*. 2006;11(2):99-111.
14. Pilowsky T, Yirmiya N, Arbelle S, Mozes T. Theory of mind abilities of children with schizophrenia, children with autism, and normally developing children. *Schizophrenia Research*. 2000;42(2):145-155.

15. Tobe RH, Corcoran CM, Breland M, et al. Differential profiles in auditory social cognition deficits between adults with autism and schizophrenia spectrum disorders: A preliminary analysis. *Journal of Psychiatric Research*. 2016;79:21-27.
16. *WebPlotDigitizer* [computer program]. Version 4.2. San Francisco, California, USA: <https://automeris.io/WebPlotDigitizer>; 2019.
17. Wells G, Shea B, O'Connell D, et al. The Newcastle-Ottawa Scale (NOS) for assessing the quality of nonrandomised studies in meta-analyses. 2012; [http://www.ohri.ca/programs/clinical\\_epidemiology/oxford.asp](http://www.ohri.ca/programs/clinical_epidemiology/oxford.asp). Accessed April, 2019.
18. Viechtbauer W, Cheung MW. Outlier and influence diagnostics for meta-analysis. *Res Synth Methods*. 2010;1(2):112-125.
19. Olkin I, Dahabreh IJ, Trikalinos TA. GOSH - a graphical display of study heterogeneity. *Res Synth Methods*. 2012;3(3):214-223.
20. Dubreucq J, Plasse J, Gabayet F, et al. Self-stigma in serious mental illness and autism spectrum disorder: Results from the REHABase national psychiatric rehabilitation cohort. *Eur Psychiatry*. 2020;63(1):e13.
21. Demetriou EA, Song CY, Park SH, et al. Autism, Early Psychosis, and Social Anxiety Disorder: a transdiagnostic examination of executive function cognitive circuitry and contribution to disability. *Transl Psychiatry*. 2018;8(1):200.
22. Pepper KL, Demetriou EA, Park SH, et al. Autism, early psychosis, and social anxiety disorder: Understanding the role of social cognition and its relationship to disability in young adults with disorders characterized by social impairments. *Transl Psychiatry*. 2018;8(1):233.
23. Couture SM, Penn DL, Losh M, Adolphs R, Hurley R, Piven J. Comparison of social cognitive functioning in schizophrenia and high functioning autism: More convergence than divergence. *Psychological medicine*. 2010;40(4):569-579.
24. Sasson N, Tsuchiya N, Hurley R, et al. Orienting to social stimuli differentiates social cognitive impairment in autism and schizophrenia. *Neuropsychologia*. 2007;45(11):2580-2588.
25. Couture SM. *Neurocognition, social cognition, and functional outcome in schizophrenia and high-functioning autism* 2006.
26. Demetriou EA, Park SH, Ho N, et al. Machine Learning for Differential Diagnosis Between Clinical Conditions With Social Difficulty: Autism Spectrum Disorder, Early Psychosis, and Social Anxiety Disorder. *Front Psychiatry*. 2020;11:545.
27. Graux J, Thillay A, Morlec V, et al. A Transnosographic Self-Assessment of Social Cognitive Impairments (ACSO): First Data. *Front Psychiatry*. 2019;10:847.

28. Lugnegård T, Unenge Hallerback M, Hjarthag F, Gillberg C. Social cognition impairments in Asperger syndrome and schizophrenia. *Schizophr Res.* 2013;143(2-3):277-284.
29. Schwarz K, Moessnang C, Schweiger JI, et al. Transdiagnostic Prediction of Affective, Cognitive, and Social Function Through Brain Reward Anticipation in Schizophrenia, Bipolar Disorder, Major Depression, and Autism Spectrum Diagnoses. *Schizophr Bull.* 2019.
30. Stanfield AC, Philip RCM, Whalley H, et al. Dissociation of Brain Activation in Autism and Schizotypal Personality Disorder During Social Judgments. *Schizophr Bull.* 2017;43(6):1220-1228.
31. Stefanik L, Erdman L, Ameis SH, et al. Brain-behavior participant similarity networks among youth and emerging adults with schizophrenia spectrum, autism spectrum, or bipolar disorder and matched controls. *Neuropsychopharmacology.* 2018;43(5):1180-1188.
32. Morrison KE, Pinkham AE, Penn DL, Kelsven S, Ludwig K, Sasson NJ. Distinct Profiles of Social Skill in Adults with Autism Spectrum Disorder and Schizophrenia. *Autism Research.* 2017;10(5):878-887.
33. Mehta UM, Thirthalli J, Subbakrishna DK, Gangadhar BN, Eack SM, Keshavan MS. Social and neuro-cognition as distinct cognitive factors in schizophrenia: A systematic review. *Schizophr Res.* 2013;148(1-3):3-11.
34. Krawczyk DC, Kandalajt MR, Didehbani N, et al. An investigation of reasoning by analogy in schizophrenia and autism spectrum disorder. *Front Hum Neurosci.* 2014;8:517.
35. Waris P, Tani P, Lindberg N, et al. Are There Differences in Neurocognition and Social Cognition Among Adolescents with Schizophrenia, a Pervasive Developmental Disorder, and Both Disorders? *Appl Neuropsychol Child.* 2016;5(4):303-310.
36. Pinkham AE, Morrison KE, Penn DL, et al. Comprehensive comparison of social cognitive performance in autism spectrum disorder and schizophrenia. *Psychological medicine.* 2019:1-9.
37. Sasson NJ, Pinkham AE, Weittenhiller LP, Faso DJ, Simpson C. Context Effects on Facial Affect Recognition in Schizophrenia and Autism: Behavioral and Eye-Tracking Evidence. *Schizophr Bull.* 2016;42(3):675-683.
38. Hyatt CJ, Calhoun VD, Pittman B, et al. Default mode network modulation by mentalizing in young adults with autism spectrum disorder or schizophrenia. *Neuroimage Clin.* 2020;27:102343.



39. Ciaramidaro A, Bolte S, Schlitt S, et al. Schizophrenia and autism as contrasting minds: Neural evidence for the hypo-hyper-intentionality hypothesis. *Schizophr Bull.* 2015;41(1):171-179.
40. Ciaramidaro A, Bolte S, Schlitt S, et al. Transdiagnostic deviant facial recognition for implicit negative emotion in autism and schizophrenia. *Eur Neuropsychopharm.* 2018;28(2):264-275.
41. Kandalaf MR, Didehbani N, Cullum CM, et al. The Wechsler ACS Social Perception Subtest: A Preliminary Comparison With Other Measures of Social Cognition. *J Psychoeduc Assess.* 2012;30(5):455-465.
42. Martinez G, Alexandre C, Mam-Lam-Fook C, et al. Phenotypic continuum between autism and schizophrenia: Evidence from the Movie for the Assessment of Social Cognition (MASC). *Schizophr Res.* 2017;185:161-166.
43. Radeloff D, Ciaramidaro A, Siniatchkin M, et al. Structural alterations of the social brain: A comparison between schizophrenia and autism. *PLoS one.* 2014;9(9):e106539.
44. Sachse M, Schlitt S, Hainz D, et al. Facial emotion recognition in paranoid schizophrenia and autism spectrum disorder. *Schizophr Res.* 2014;159(2-3):509-514.
45. Martínez A, Tobe R, Dias EC, et al. Differential Patterns of Visual Sensory Alteration Underlying Face Emotion Recognition Impairment and Motion Perception Deficits in Schizophrenia and Autism Spectrum Disorder. *Biological psychiatry.* 2019;86(7):557-567.
46. Kuo SS, Wojtalik JA, Meshulam-Gately RI, Keshavan MS, Eack SM. Establishing a standard emotion processing battery for treatment evaluation in adults with autism spectrum disorder: Evidence supporting the Mayer-Salovey-Caruso Emotion Intelligence Test (MSCEIT). *Psychiatry research.* 2019;278:116-124.
47. Eack SM, Bahorik AL, McKnight SA, et al. Commonalities in social and non-social cognitive impairments in adults with autism spectrum disorder and schizophrenia. *Schizophr Res.* 2013;148(1-3):24-28.
48. Martinez G, Mosconi E, Daban-Huard C, et al. "A circle and a triangle dancing together": Alteration of social cognition in schizophrenia compared to autism spectrum disorders. *Schizophr Res.* 2019;210:94-100.
49. Tin LN, Lui SSY, Ho KKY, et al. High-functioning autism patients share similar but more severe impairments in verbal theory of mind than schizophrenia patients. *Psychological medicine.* 2018;48(8):1264-1273.
50. Craig JS, Hatton C, Craig FB, Bentall RP. Persecutory beliefs, attributions and theory of mind: Comparison of patients with paranoid delusions, Asperger's syndrome and healthy controls. *Schizophr Res.* 2004;69(1):29-33.

51. Booules-Katri TM, Pedreno C, Navarro JB, Pamias M, Obiols JE. Theory of Mind (ToM) Performance in High Functioning Autism (HFA) and Schizotypal-Schizoid Personality Disorders (SSPD) Patients. *Journal of autism and developmental disorders*. 2019;49(8):3376-3386.
